# Supplementary material
Source: Royal Society of Chemistry journal article supplement (doi:10.1039/d6tc00552g)
Supplement: d6tc00552g1.pdf [file d6tc00552g1.pdf]

Supplementary Information for:

## Metal-Driven Interface Engineering Enables Multi-functionality in SrTiO<sub>3</sub> Memristor Devices

Seyed Mehdi Sattari-Esfahlan<sup>1\*</sup>, Marko Mladenović<sup>2</sup>, Mathieu Luisier<sup>2</sup>, Venkata R. Nallagatla<sup>3</sup>,  
Hyoung-Gyun Kim<sup>4</sup>

<sup>1</sup>Institute for Microelectronics, Vienna University of Technology, Gusshausstrasse 27-29, 1040  
Vienna, Austria

<sup>2</sup>Integrated Systems Laboratory, ETH Zurich, 8092 Zurich, Switzerland.

<sup>3</sup>Silicon Austria Labs GmbH, Sandgasse 34, Graz A-8010, Austria

<sup>4</sup>Samsung Electronics Inc., Hwasung-Si, Gyeonggi-Do, Republic of Korea

Corresponding Author's E-mail: [sattari@iue.tuwien.ac.at](mailto:sattari@iue.tuwien.ac.at)

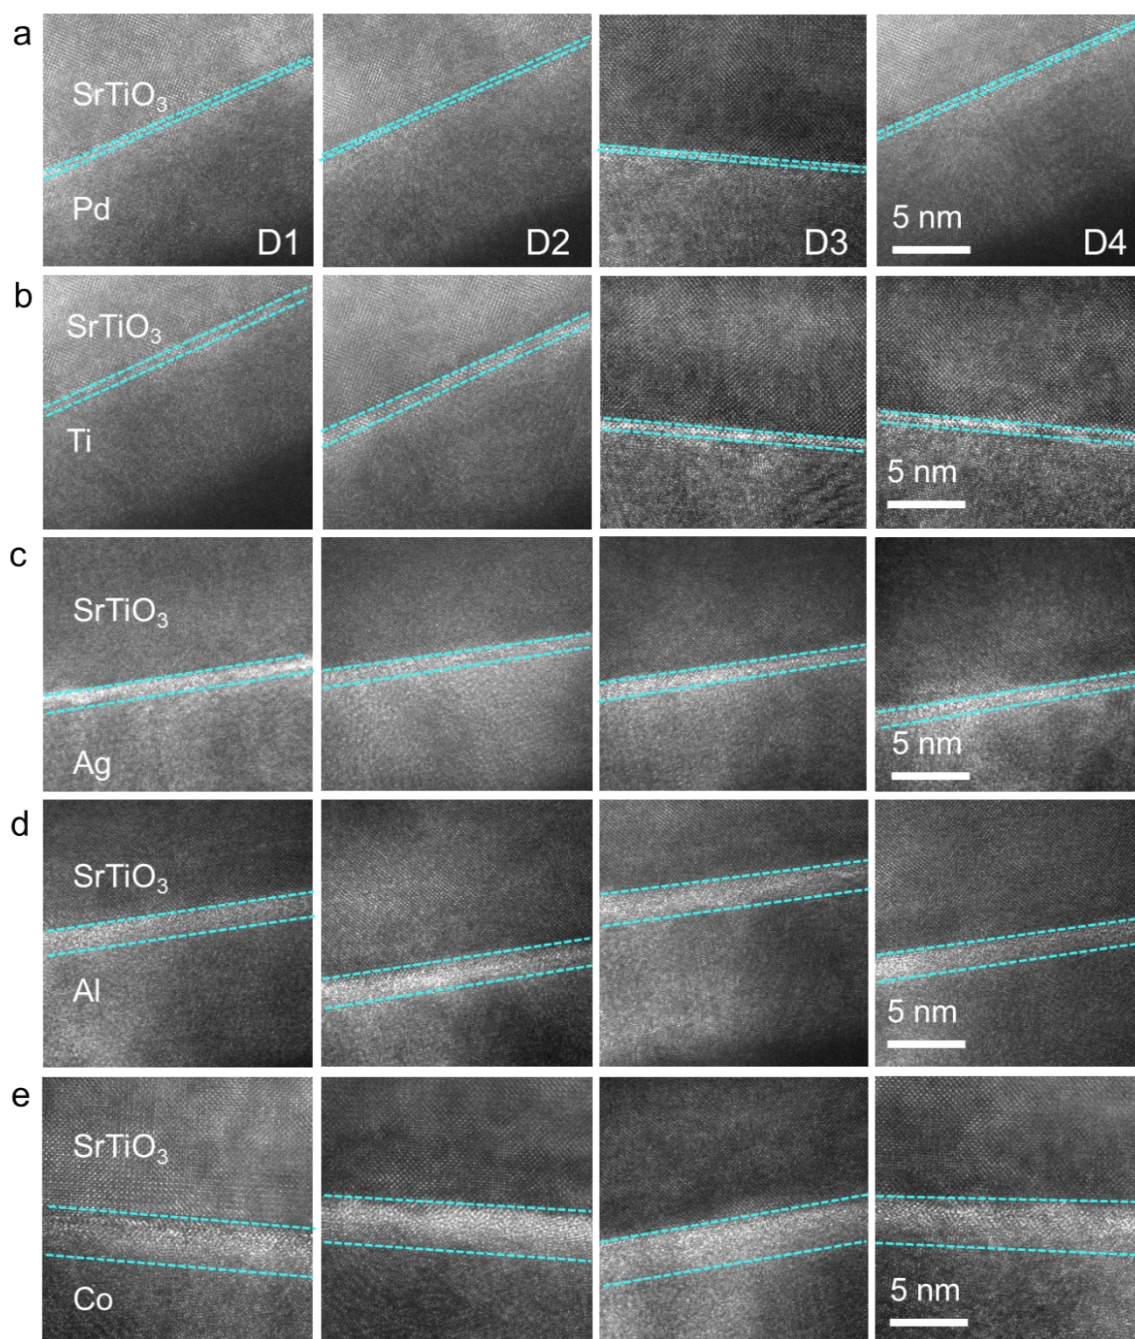

**Figure S1.** Cross-sectional HAADF-STEM images of metal/SrTiO<sub>3</sub> show the interfacial width. In each row, four images are shown per metal, corresponding to devices D1-D4.

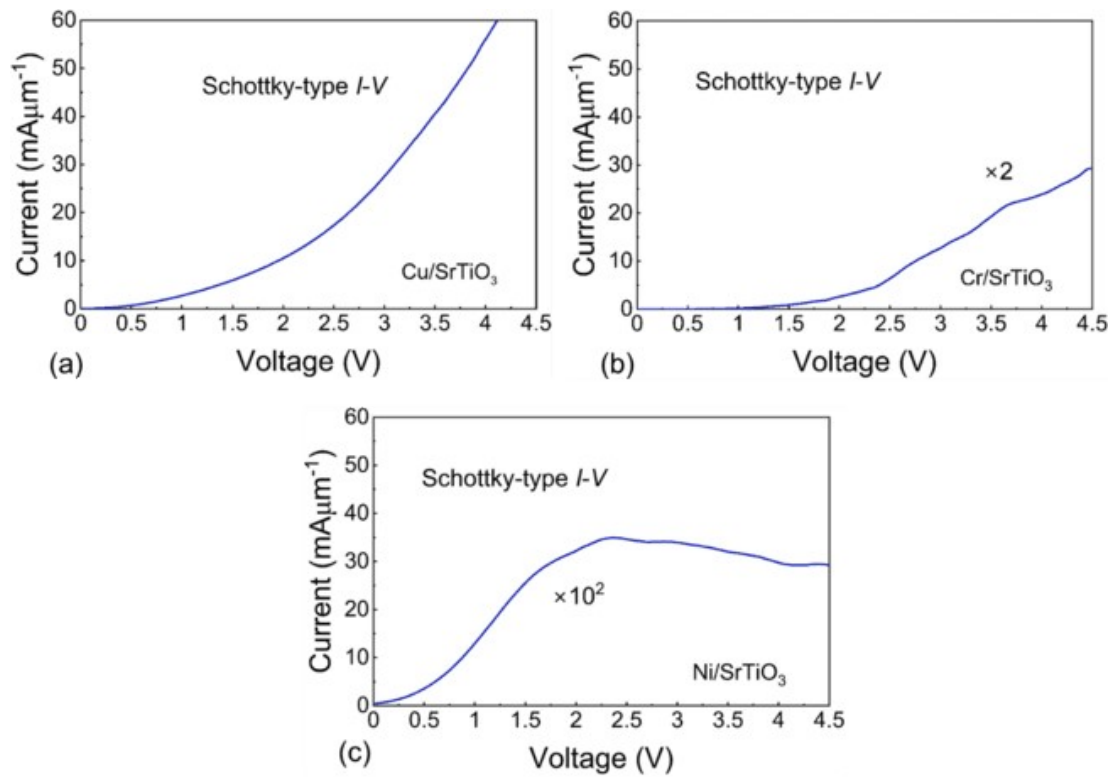

**Figure S2.**  $I-V$  characteristics of  $\text{SrTiO}_3$  device with (a) Cu, (b) Cr, and (c) Ni electrodes

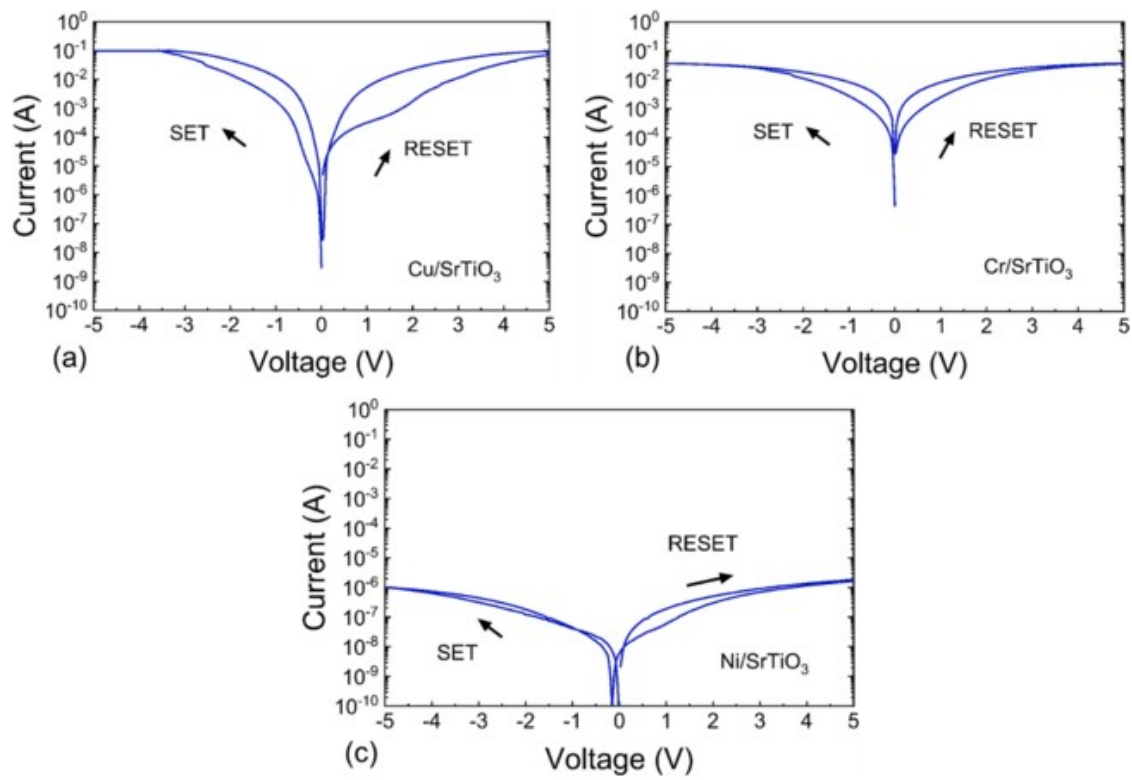

**Figure S3.** *I-V* characteristics of SrTiO<sub>3</sub> device in SET and RESET bias sweeping with (a) Cu, (b) Cr, and (c) Ni electrodes

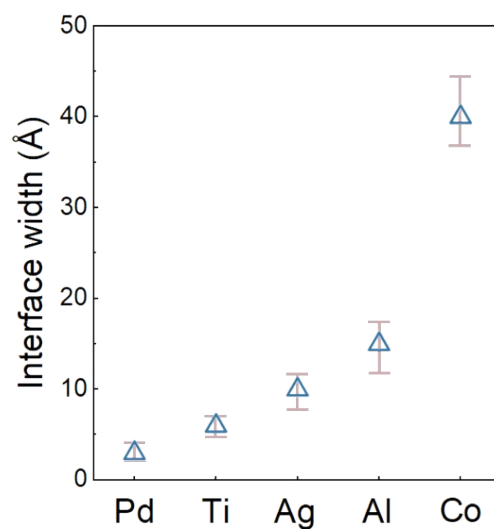

**Figure S4.** Error bar plot showing the variation in the interface width of different metals

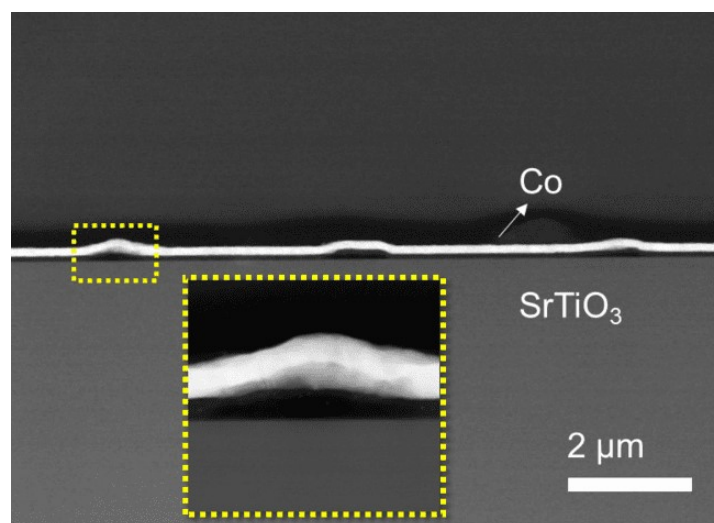

**Figure S5.** Cross-sectional SEM image of the Co/SrTiO<sub>3</sub> resistive switching device. The inset shows a magnified view of an individual device region, highlighting the dome-shaped Co contact and its conformal interface with the SrTiO<sub>3</sub> layer.

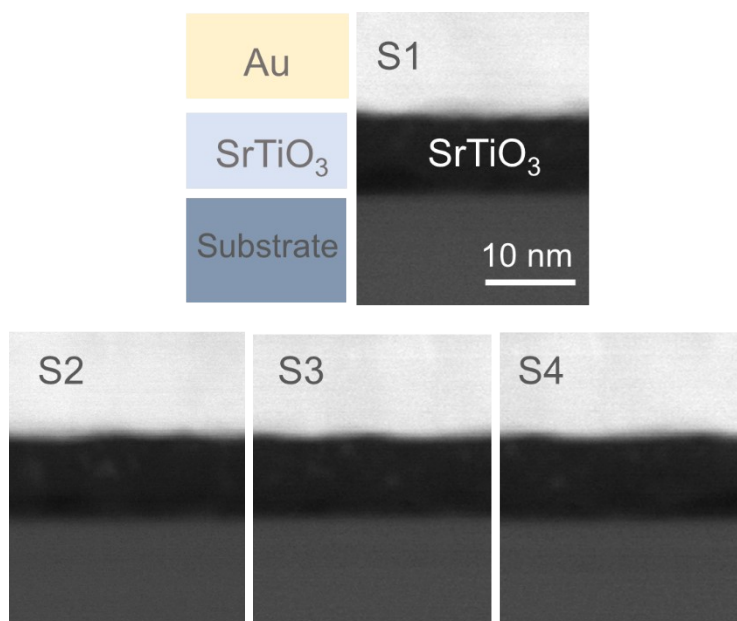

**Figure S6.** STEM images of four samples(S1-S4) showing smooth film morphology of SrTiO<sub>3</sub> film, later used for device fabrication with different metals.

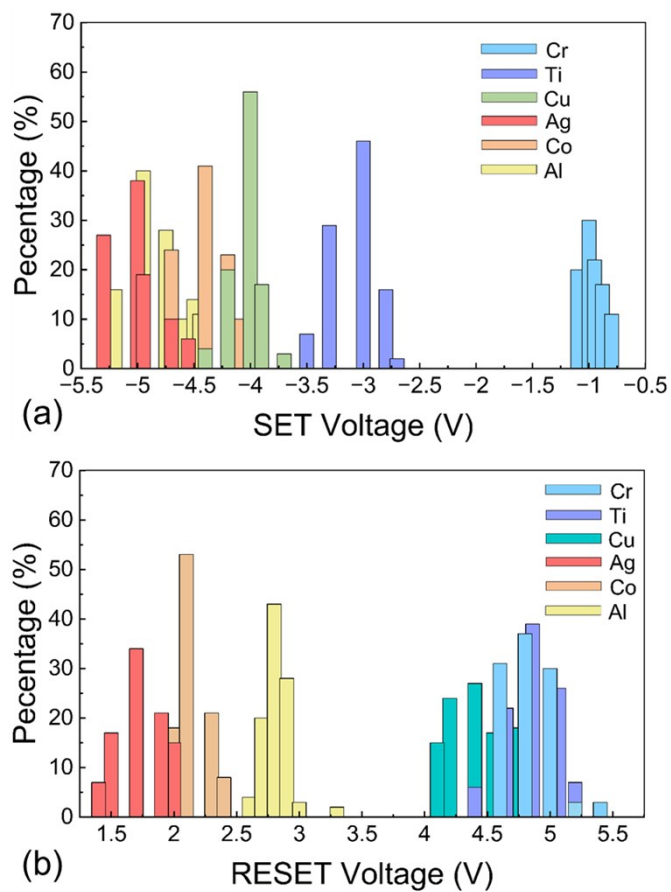

**Figure S7.** (a) SET and (b) RESET voltage distribution of the SrTiO<sub>3</sub> multifunctional devices with different metals.

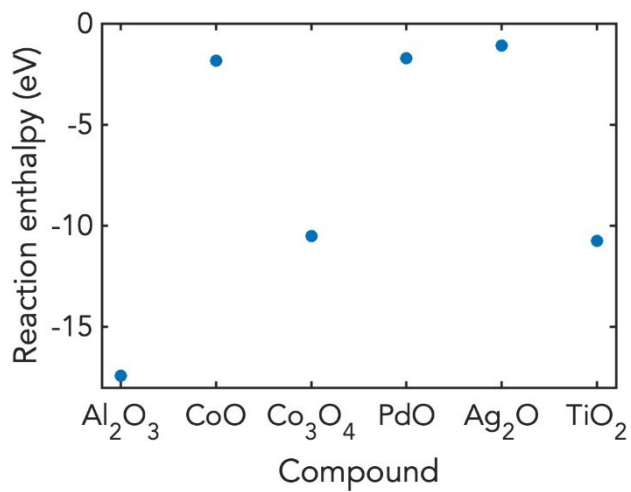

**Figure S8.** Formation enthalpies of oxides derived from Al, Pd, Ti, Co, and Ag.

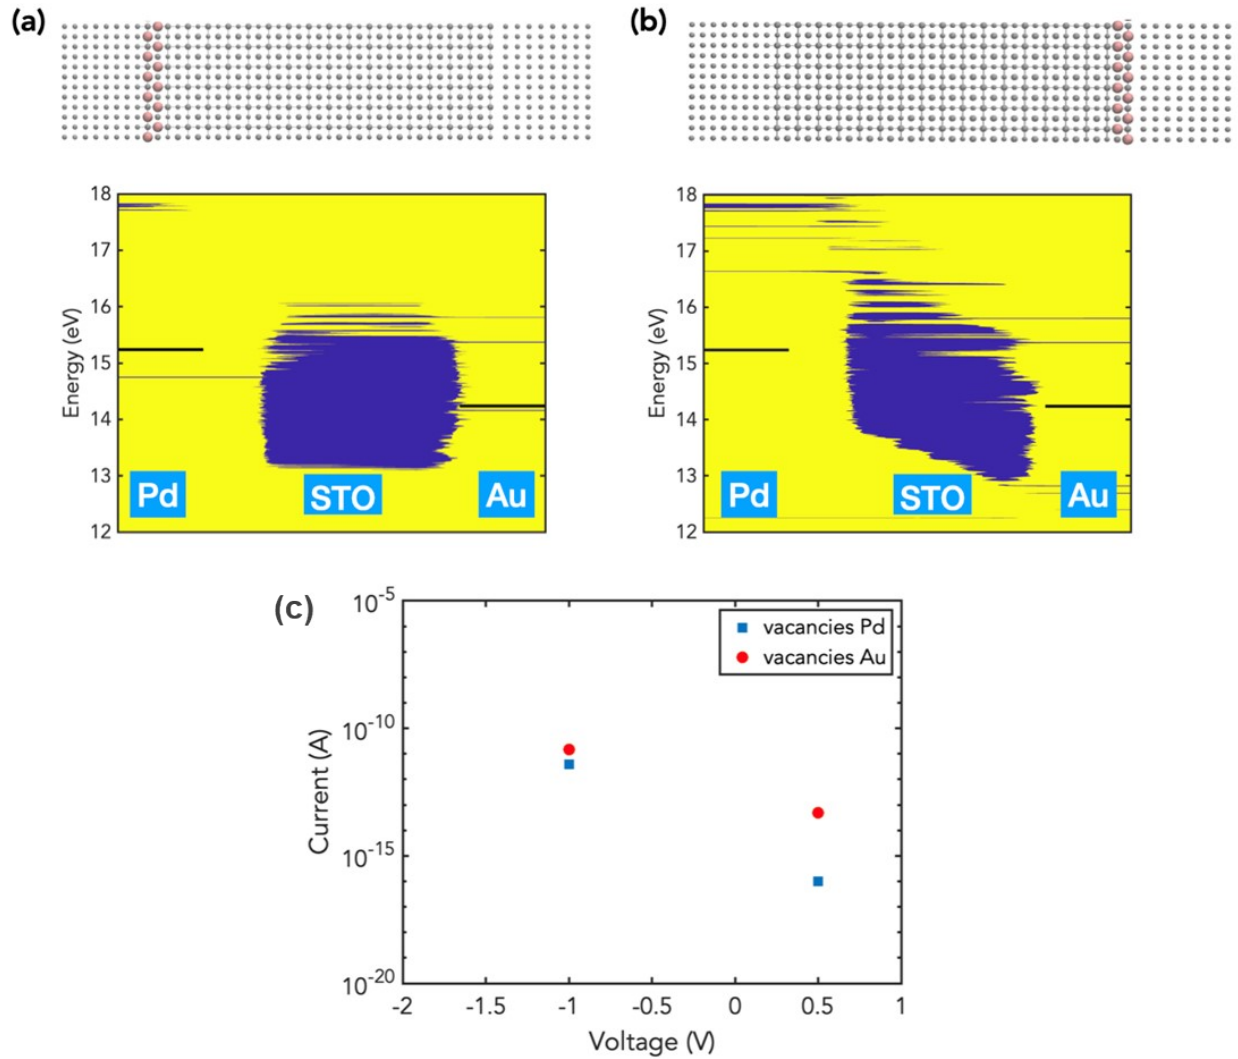

**Figure S9.** The atomistic structures and the corresponding local density of states (LDOS) plots for Pd-SrTiO<sub>3</sub>-Au devices with oxygen vacancies (shown in pink) located at the Pd-SrTiO<sub>3</sub> (a) and SrTiO<sub>3</sub>-Au interface (b). Yellow and blue regions denote high and low DOS, respectively. The black horizontal lines indicate the Fermi levels of the electrodes at -1V applied to the Pd electrode (1V applied to the Au electrode). (c) Current for the devices in a-b calculated at -1V and 0.5V voltages.
